# Supplementary material for: AZn2(BO3)Si2O5 (A = Rb, Cs): first examples of KBe2BO3F2 structure type in the borosilicate family exhibiting a deep-ultraviolet cutoff edge
Source: Royal Society of Chemistry journal article supplement (doi:10.1039/d1tc05529a), 2021-12-24
Supplement: d1tc05529a1.pdf [file d1tc05529a1.pdf]

**Electronic Supporting Information**

**AZn<sub>2</sub>(BO<sub>3</sub>)Si<sub>2</sub>O<sub>5</sub> (A= Rb, Cs): First Examples of KBe<sub>2</sub>BO<sub>3</sub>F<sub>2</sub> Structure Type in the Borosilicate Family Exhibiting Deep-ultraviolet Cutoff Edge**

Tuohetijiang Baiheti,<sup>a,b</sup> Abudukadi Tudi,<sup>a,b</sup> Jian Han,<sup>a,b</sup> Zhihua Yang,<sup>\*a,b</sup> and Shilie Pan<sup>\*a,b</sup>

<sup>a</sup> CAS Key Laboratory of Functional Materials and Devices for Special Environments, Xinjiang Technical Institute of Physics & Chemistry, CAS; Xinjiang Key Laboratory of Electronic Information Materials and Devices, 40-1 South Beijing Road, Urumqi 830011, China.

<sup>b</sup> Center of Materials Science and Optoelectronics Engineering, University of Chinese Academy of Sciences, Beijing 100049, China.

Fax:(86)-991-3838957; Tel: (86)-991-3674558.

To whom correspondence should be addressed:

E-mail: [slpan@ms.xjb.ac.cn](mailto:slpan@ms.xjb.ac.cn) (Shilie Pan)

**Table S1.** Crystal data and structure refinements for **RbZn<sub>2</sub>(BO<sub>3</sub>)Si<sub>2</sub>O<sub>5</sub>** and **CsZn<sub>2</sub>(BO<sub>3</sub>)Si<sub>2</sub>O<sub>5</sub>**.

| Empirical formula                                                                                                      | RbZn <sub>2</sub> (BO <sub>3</sub> )Si <sub>2</sub> O <sub>5</sub>  | CsZn <sub>2</sub> (BO <sub>3</sub> )Si <sub>2</sub> O <sub>5</sub> |
|------------------------------------------------------------------------------------------------------------------------|---------------------------------------------------------------------|--------------------------------------------------------------------|
| Formula weight                                                                                                         | 411.20                                                              | 458.64                                                             |
| Crystal system                                                                                                         | Orthorhombic                                                        | Orthorhombic                                                       |
| Space group, Z                                                                                                         | <i>Cmc</i> 2 <sub>1</sub> , 4                                       | <i>Cmc</i> 2 <sub>1</sub> , 4                                      |
| Unit cell dimensions (Å)                                                                                               | <i>a</i> = 8.308(5)<br><i>b</i> = 19.345(14)<br><i>c</i> = 4.935(3) | <i>a</i> = 8.446(3)<br><i>b</i> = 19.494(7)<br><i>c</i> = 4.963(2) |
| Volume (Å <sup>3</sup> )                                                                                               | 793.19(9)                                                           | 817.24(5)                                                          |
| Density (calc) (g/cm <sup>3</sup> )                                                                                    | 3.443                                                               | 3.728                                                              |
| θ range for data collection (deg)                                                                                      | 2.11-27.52                                                          | 2.628-27.503                                                       |
| Limiting indices                                                                                                       | -10 ≤ <i>h</i> ≤ 10, -25 ≤ <i>k</i> ≤ 25, -6 ≤ <i>l</i> ≤ 6         | -10 ≤ <i>h</i> ≤ 7, -25 ≤ <i>k</i> ≤ 24, -6 ≤ <i>l</i> ≤ 6         |
| Reflections collected/unique                                                                                           | 9181/955 [R(int) = 0.0906]                                          | 9143/1003 [R(int) = 0.0668]                                        |
| Data/restraints/parameters                                                                                             | 955 / 13 / 71                                                       | 1003 / 1 / 71                                                      |
| Completeness (%)                                                                                                       | 99.6                                                                | 98.9                                                               |
| Goodness of fit on <i>F</i> <sub>o</sub> <sup>2</sup>                                                                  | 1.074                                                               | 1.155                                                              |
| Final <i>R</i> indices [ <i>F</i> <sub>o</sub> <sup>2</sup> > 2σ( <i>F</i> <sub>o</sub> <sup>2</sup> )] <sup>[a]</sup> | <i>R</i> <sub>1</sub> = 0.0310, <i>wR</i> <sub>2</sub> = 0.0664     | <i>R</i> <sub>1</sub> = 0.0260, <i>wR</i> <sub>2</sub> = 0.0626    |
| <i>R</i> indices (all data) <sup>[a]</sup>                                                                             | <i>R</i> <sub>1</sub> = 0.0332, <i>wR</i> <sub>2</sub> = 0.0677     | <i>R</i> <sub>1</sub> = 0.0293, <i>wR</i> <sub>2</sub> = 0.0635    |
| Largest diff. peak and hole (e/Å <sup>3</sup> )                                                                        | 1.191 and -0.762                                                    | 0.908 and -0.902                                                   |
| Absolute structure parameter                                                                                           | -0.070(13)                                                          | 0.15(4)                                                            |

<sup>[a]</sup>*R*<sub>1</sub> = Σ ||*F*<sub>o</sub>| - |*F*<sub>c</sub>|| / Σ |*F*<sub>o</sub>| and *wR*<sub>2</sub> = [Σw(*F*<sub>o</sub><sup>2</sup> - *F*<sub>c</sub><sup>2</sup>)<sup>2</sup> / Σw*F*<sub>o</sub><sup>4</sup>]<sup>1/2</sup> for *F*<sub>o</sub><sup>2</sup> > 2σ(*F*<sub>o</sub><sup>2</sup>).

**Table S2.** The final atomic coordinates ( $\times 10^4$ ) and equivalent isotropic displacement parameters ( $\text{\AA}^2 \times 10^3$ ) for **RbZn<sub>2</sub>(BO<sub>3</sub>)Si<sub>2</sub>O<sub>5</sub>** and **CsZn<sub>2</sub>(BO<sub>3</sub>)Si<sub>2</sub>O<sub>5</sub>**,  $U_{\text{eq}}$  is defined as one-third of the trace of the orthogonalized  $U_{ij}$  tensor, and the bond valence sum for each atom in asymmetric unit.

| <b>CsZn<sub>2</sub>(BO<sub>3</sub>)Si<sub>2</sub>O<sub>5</sub></b> |          |         |          |       |       |
|--------------------------------------------------------------------|----------|---------|----------|-------|-------|
| Atom                                                               | x        | y       | z        | U(eq) | BVS   |
| Cs(1)                                                              | 10000    | 6140(1) | 3614(3)  | 24(1) | 1.028 |
| Zn(1)                                                              | 8105(1)  | 7956(1) | 3635(4)  | 13(1) | 2.108 |
| Si(1)                                                              | 13141(2) | 4544(1) | 3556(16) | 30(1) | 4.327 |
| B(1)                                                               | 5000     | 7287(6) | 3520(60) | 13(2) | 2.847 |
| O(1)                                                               | 15000    | 4425(5) | 3550(50) | 47(3) | 2.112 |
| O(2)                                                               | 12255(5) | 3854(2) | 3700(30) | 23(1) | 2.146 |
| O(3)                                                               | 12602(8) | 5048(8) | 5980(40) | 74(3) | 2.257 |
| O(4)                                                               | 6426(7)  | 7322(3) | 4881(11) | 18(1) | 1.943 |
| O(5)                                                               | 10000    | 7731(4) | 5723(15) | 18(2) | 1.976 |

| <b>RbZn<sub>2</sub>(BO<sub>3</sub>)Si<sub>2</sub>O<sub>5</sub></b> |          |          |          |       |       |
|--------------------------------------------------------------------|----------|----------|----------|-------|-------|
| Atom                                                               | x        | y        | z        | U(eq) | BVS   |
| Rb(1)                                                              | 10000    | 8832(1)  | 3975(1)  | 24(1) | 0.834 |
| Zn(1)                                                              | 8075(1)  | 7034(1)  | 4051(1)  | 12(1) | 2.072 |
| Si(1)                                                              | 13088(1) | 10454(1) | 3705(2)  | 25(1) | 4.213 |
| B(1)                                                               | 5000     | 7729(2)  | 3918(11) | 13(1) | 2.949 |
| O(1)                                                               | 12141(2) | 11142(1) | 4232(5)  | 16(1) | 2.002 |
| O(2)                                                               | 15000    | 10584(1) | 3735(7)  | 26(1) | 2.066 |
| O(3)                                                               | 12608(3) | 9842(1)  | 5684(4)  | 31(1) | 2.152 |
| O(4)                                                               | 6457(2)  | 7711(1)  | 5183(4)  | 19(1) | 1.967 |
| O(5)                                                               | 10000    | 7275(2)  | 6060(5)  | 19(1) | 2.046 |

**Table S3.** Selected bond distances (Å) and angles (deg) for **RbZn<sub>2</sub>(BO<sub>3</sub>)Si<sub>2</sub>O<sub>5</sub>** and **CsZn<sub>2</sub>(BO<sub>3</sub>)Si<sub>2</sub>O<sub>5</sub>**.

| <b>CsZn<sub>2</sub>(BO<sub>3</sub>)Si<sub>2</sub>O<sub>5</sub></b> |            |                     |            |
|--------------------------------------------------------------------|------------|---------------------|------------|
| Cs(1)-O(2)#1                                                       | 3.094(12)  | Zn(1)-O(5)          | 1.957(4)   |
| Cs(1)-O(2)#2                                                       | 3.094(12)  | Zn(1)-O(4)          | 1.980(6)   |
| Cs(1)-O(2)#3                                                       | 3.162(13)  | Zn(1)-O(4)#7        | 1.980(6)   |
| Cs(1)-O(2)#4                                                       | 3.162(13)  | Si(1)-O(2)          | 1.541(5)   |
| Cs(1)-O(5)                                                         | 3.273(8)   | Si(1)-O(3)#2        | 1.574(18)  |
| Cs(1)-O(3)                                                         | 3.277(16)  | Si(1)-O(1)          | 1.587(2)   |
| Cs(1)-O(3)#5                                                       | 3.277(16)  | Si(1)-O(3)          | 1.618(17)  |
| Cs(1)-O(3)#1                                                       | 3.451(17)  | B(1)-O(4)#9         | 1.383(16)  |
| Cs(1)-O(3)#2                                                       | 3.451(17)  | B(1)-O(4)           | 1.383(16)  |
| Zn(1)-O(2)#8                                                       | 1.893(4)   | B(1)-O(5)#7         | 1.39(3)    |
| O(2)#1-Cs(1)-O(2)#2                                                | 76.0(4)    | O(3)-Cs(1)-O(4)#6   | 118.9(3)   |
| O(2)#1-Cs(1)-O(2)#3                                                | 179.0(3)   | O(3)#5-Cs(1)-O(4)#6 | 156.6(3)   |
| O(2)#2-Cs(1)-O(2)#3                                                | 104.98(14) | O(3)#1-Cs(1)-O(4)#6 | 123.9(3)   |
| O(2)#1-Cs(1)-O(2)#4                                                | 104.98(14) | O(3)#2-Cs(1)-O(4)#6 | 98.4(2)    |
| O(2)#2-Cs(1)-O(2)#4                                                | 179.0(3)   | O(2)#1-Cs(1)-O(4)#7 | 53.57(12)  |
| O(2)#3-Cs(1)-O(2)#4                                                | 74.1(3)    | O(2)#2-Cs(1)-O(4)#7 | 78.71(16)  |
| O(2)#1-Cs(1)-O(5)                                                  | 104.40(13) | O(2)#3-Cs(1)-O(4)#7 | 126.08(12) |
| O(2)#2-Cs(1)-O(5)                                                  | 104.40(13) | O(2)#4-Cs(1)-O(4)#7 | 101.50(15) |
| O(2)#3-Cs(1)-O(5)                                                  | 75.01(13)  | O(5)-Cs(1)-O(4)#7   | 52.87(15)  |
| O(2)#4-Cs(1)-O(5)                                                  | 75.01(13)  | O(3)-Cs(1)-O(4)#7   | 156.6(3)   |
| O(2)#1-Cs(1)-O(3)                                                  | 134.2(3)   | O(3)#5-Cs(1)-O(4)#7 | 118.9(3)   |
| O(2)#2-Cs(1)-O(3)                                                  | 82.6(4)    | O(3)#1-Cs(1)-O(4)#7 | 98.4(2)    |
| O(2)#3-Cs(1)-O(3)                                                  | 46.6(3)    | O(3)#2-Cs(1)-O(4)#7 | 123.9(3)   |
| O(2)#4-Cs(1)-O(3)                                                  | 96.9(4)    | O(4)#6-Cs(1)-O(4)#7 | 37.74(17)  |
| O(5)-Cs(1)-O(3)                                                    | 120.1(3)   | O(2)#8-Zn(1)-O(5)   | 120.6(4)   |
| O(2)#1-Cs(1)-O(3)#5                                                | 82.6(4)    | O(2)#8-Zn(1)-O(4)   | 107.5(2)   |
| O(2)#2-Cs(1)-O(3)#5                                                | 134.2(3)   | O(5)-Zn(1)-O(4)     | 106.3(3)   |
| O(2)#3-Cs(1)-O(3)#5                                                | 96.9(4)    | O(2)#8-Zn(1)-O(4)#7 | 110.2(5)   |
| O(2)#4-Cs(1)-O(3)#5                                                | 46.6(3)    | O(5)-Zn(1)-O(4)#7   | 105.9(3)   |
| O(5)-Cs(1)-O(3)#5                                                  | 120.1(3)   | O(4)-Zn(1)-O(4)#7   | 105.45(19) |
| O(3)-Cs(1)-O(3)#5                                                  | 84.3(5)    | O(2)-Si(1)-O(3)#2   | 109.7(10)  |
| O(5)-Cs(1)-O(3)#2                                                  | 139.2(2)   | O(2)-Si(1)-O(1)     | 110.7(4)   |
| O(3)-Cs(1)-O(3)#2                                                  | 43.32(7)   | O(3)#2-Si(1)-O(1)   | 111.0(10)  |
| O(3)#5-Cs(1)-O(3)#2                                                | 97.31(14)  | O(2)-Si(1)-O(3)     | 111.0(10)  |
| O(3)#1-Cs(1)-O(3)#2                                                | 79.1(5)    | O(3)#2-Si(1)-O(3)   | 102.5(2)   |
| O(2)#1-Cs(1)-O(4)#6                                                | 78.71(16)  | O(1)-Si(1)-O(3)     | 111.7(10)  |
| O(2)#2-Cs(1)-O(4)#6                                                | 53.57(12)  | O(4)#9-B(1)-O(4)    | 121(2)     |
| O(2)#3-Cs(1)-O(4)#6                                                | 101.50(15) | O(4)#9-B(1)-O(5)#7  | 119.4(10)  |
| O(2)#4-Cs(1)-O(4)#6                                                | 126.08(12) | O(4)-B(1)-O(5)#7    | 119.4(10)  |

|                   |           |
|-------------------|-----------|
| O(5)-Cs(1)-O(4)#6 | 52.87(15) |
|-------------------|-----------|

Symmetry transformations used to generate equivalent atoms:

|                    |                         |                        |                    |
|--------------------|-------------------------|------------------------|--------------------|
| #1 -x+2,-y+1,z-1/2 | #2 x,-y+1,z-1/2         | #3 x,-y+1,z+1/2        | #4 -x+2,-y+1,z+1/2 |
| #5 -x+2,y,z        | #6 x+1/2,-y+3/2,z-1/2   | #7 -x+3/2,-y+3/2,z-1/2 | #8 x-1/2,y+1/2,z   |
| #9 -x+1,y,z        | #10 -x+3/2,-y+3/2,z+1/2 | #11 -x+3,y,z           | #12 x+1/2,y-1/2,z  |

**RbZn<sub>2</sub>(BO<sub>3</sub>)Si<sub>2</sub>O<sub>5</sub>**

|                     |            |                     |            |
|---------------------|------------|---------------------|------------|
| Rb(1)-O(1)#1        | 2.940(2)   | Zn(1)-O(4)          | 1.9575(19) |
| Rb(1)-O(1)#2        | 2.940(2)   | Zn(1)-O(4)#7        | 2.0096(19) |
| Rb(1)-O(3)#3        | 3.038(2)   | Si(1)-O(1)          | 1.5683(16) |
| Rb(1)-O(3)          | 3.038(2)   | Si(1)-O(3)          | 1.585(2)   |
| Rb(1)-O(1)#4        | 3.146(2)   | Si(1)-O(2)          | 1.6082(8)  |
| Rb(1)-O(1)#5        | 3.146(2)   | Si(1)-O(3)#2        | 1.647(2)   |
| Rb(1)-O(5)          | 3.182(3)   | B(1)-O(4)#9         | 1.362(3)   |
| Zn(1)-O(1)#6        | 1.8940(15) | B(1)-O(4)           | 1.362(3)   |
| Zn(1)-O(5)          | 1.9384(15) | B(1)-O(5)#7         | 1.410(6)   |
| O(1)#1-Rb(1)-O(1)#2 | 74.45(8)   | O(3)-Rb(1)-O(5)     | 121.29(5)  |
| O(1)#1-Rb(1)-O(3)#3 | 77.21(5)   | O(1)#4-Rb(1)-O(5)   | 75.43(5)   |
| O(1)#2-Rb(1)-O(3)#3 | 129.91(5)  | O(1)#5-Rb(1)-O(5)   | 75.43(5)   |
| O(1)#1-Rb(1)-O(3)   | 129.91(5)  | O(1)#6-Zn(1)-O(5)   | 122.21(10) |
| O(1)#2-Rb(1)-O(3)   | 77.21(5)   | O(1)#6-Zn(1)-O(4)   | 108.31(8)  |
| O(3)#3-Rb(1)-O(3)   | 91.01(9)   | O(5)-Zn(1)-O(4)     | 105.07(9)  |
| O(1)#1-Rb(1)-O(1)#4 | 176.64(6)  | O(1)#6-Zn(1)-O(4)#7 | 110.34(9)  |
| O(1)#2-Rb(1)-O(1)#4 | 108.31(5)  | O(5)-Zn(1)-O(4)#7   | 105.49(9)  |
| O(3)#3-Rb(1)-O(1)#4 | 99.46(5)   | O(4)-Zn(1)-O(4)#7   | 103.88(6)  |
| O(3)-Rb(1)-O(1)#4   | 50.03(5)   | O(1)-Si(1)-O(3)     | 113.91(12) |
| O(1)#1-Rb(1)-O(1)#5 | 108.31(5)  | O(1)-Si(1)-O(2)     | 111.21(12) |
| O(1)#2-Rb(1)-O(1)#5 | 176.64(6)  | O(3)-Si(1)-O(2)     | 111.05(15) |
| O(3)#3-Rb(1)-O(1)#5 | 50.03(5)   | O(1)-Si(1)-O(3)#2   | 108.93(12) |
| O(3)-Rb(1)-O(1)#5   | 99.46(5)   | O(3)-Si(1)-O(3)#2   | 103.68(7)  |
| O(1)#4-Rb(1)-O(1)#5 | 68.87(7)   | O(2)-Si(1)-O(3)#2   | 107.58(16) |
| O(1)#1-Rb(1)-O(5)   | 105.86(5)  | O(4)#9-B(1)-O(4)    | 125.3(4)   |
| O(1)#2-Rb(1)-O(5)   | 105.86(5)  | O(4)#9-B(1)-O(5)#7  | 117.3(2)   |
| O(3)#3-Rb(1)-O(5)   | 121.28(5)  | O(4)-B(1)-O(5)#7    | 117.3(2)   |

Symmetry transformations used to generate equivalent atoms:

|                        |                  |                        |                 |
|------------------------|------------------|------------------------|-----------------|
| #1 -x+2,-y+2,z-1/2     | #2 x,-y+2,z-1/2  | #3 -x+2,y,z            | #4 x,-y+2,z+1/2 |
| #5 -x+2,-y+2,z+1/2     | #6 x-1/2,y-1/2,z | #7 -x+3/2,-y+3/2,z-1/2 |                 |
| #8 -x+3/2,-y+3/2,z+1/2 | #9 -x+1,y,z      | #10 x+1/2,y+1/2,z      | #11 -x+3,y,z    |

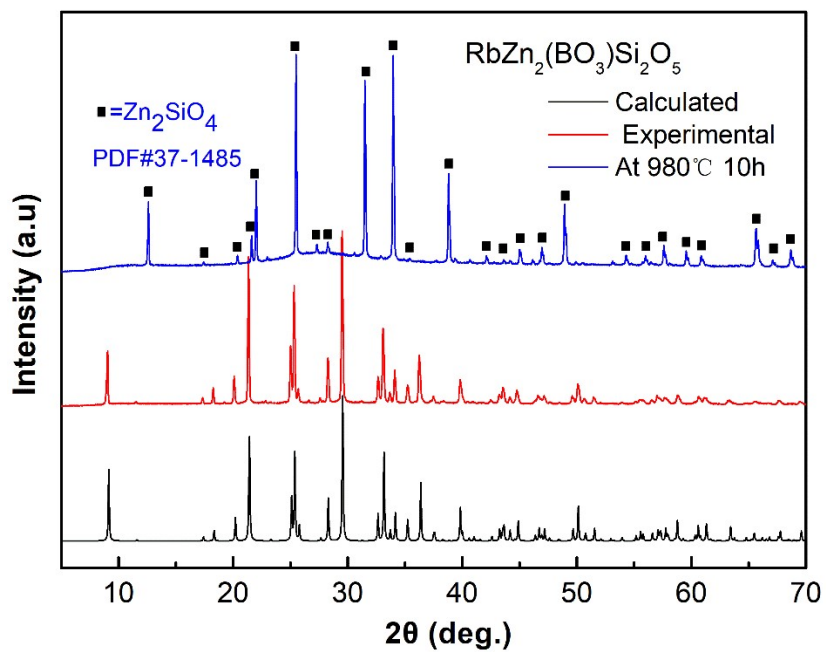

**(a)**

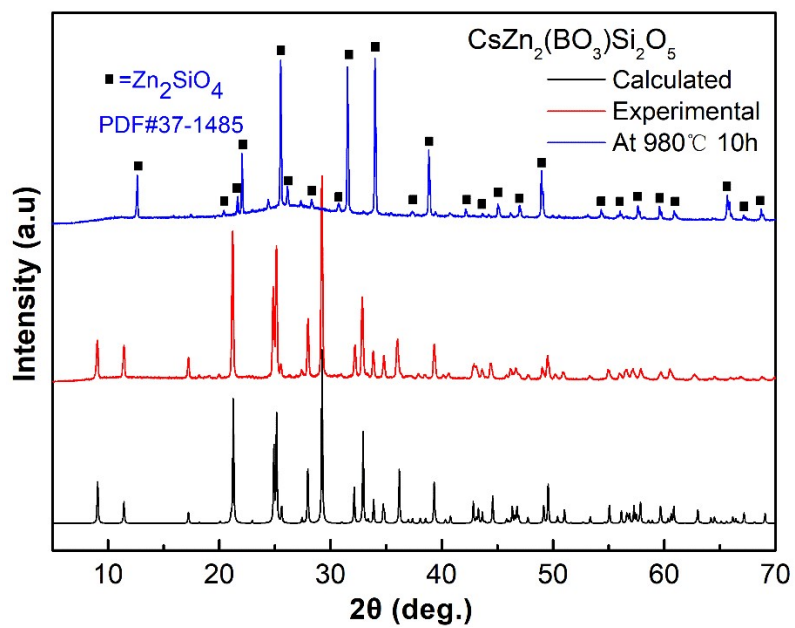

**(b)**

**Figure S1.** Powder XRD patterns of (a) RbZn<sub>2</sub>(BO<sub>3</sub>)Si<sub>2</sub>O<sub>5</sub>, and (b) CsZn<sub>2</sub>(BO<sub>3</sub>)Si<sub>2</sub>O<sub>5</sub>.

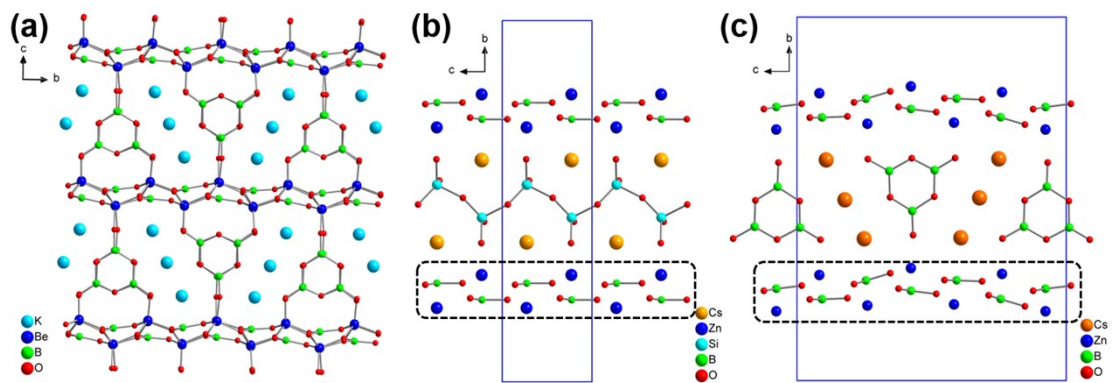

**Figure S2.** (a) 3D crystal structure of  $\gamma$ -KBe<sub>2</sub>B<sub>3</sub>O<sub>7</sub> view along the *a* axis, (b) alignment pattern of BO<sub>3</sub> groups in the crystal structure of CsZn<sub>2</sub>(BO<sub>3</sub>)Si<sub>2</sub>O<sub>5</sub>, (c) and alignment pattern of BO<sub>3</sub> groups in the crystal structure of Cs<sub>3</sub>Zn<sub>6</sub>B<sub>9</sub>O<sub>21</sub>.

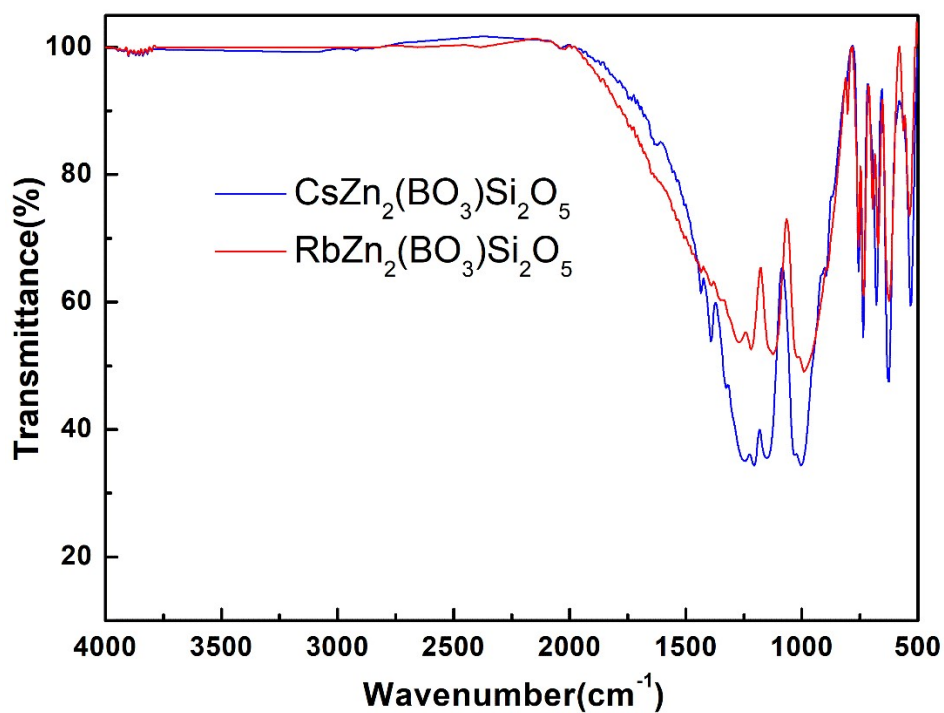

**Figure S3.** IR spectra of RbZn<sub>2</sub>(BO<sub>3</sub>)Si<sub>2</sub>O<sub>5</sub> (red), and CsZn<sub>2</sub>(BO<sub>3</sub>)Si<sub>2</sub>O<sub>5</sub> (blue).

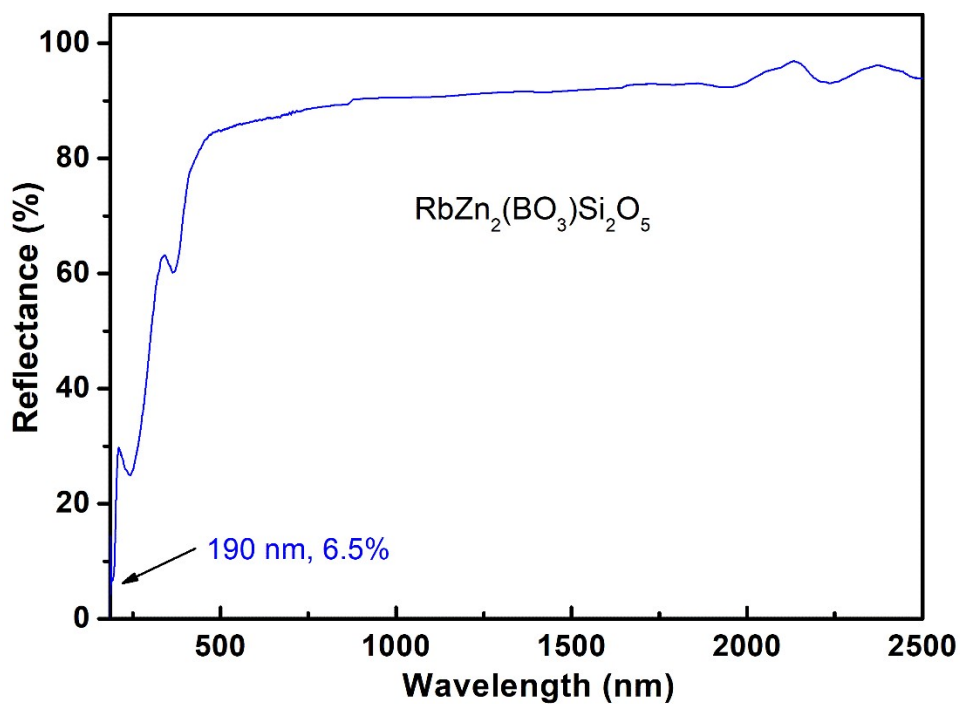

**Figure S4.** UV-vis-NIR diffuse reflectance spectrum of  $\text{RbZn}_2(\text{BO}_3)\text{Si}_2\text{O}_5$ .

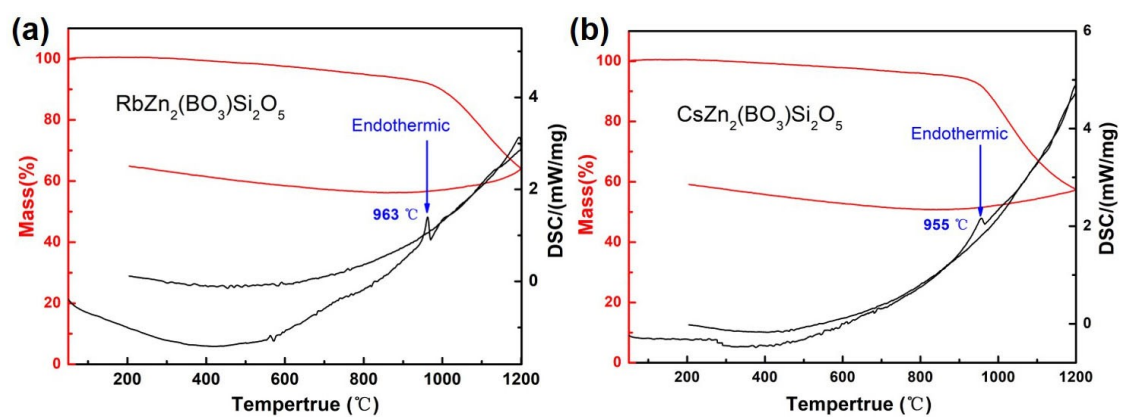

**Figure S5.** The TG-DSC curves of polycrystalline samples of  $\text{RbZn}_2(\text{BO}_3)\text{Si}_2\text{O}_5$  (a), and  $\text{CsZn}_2(\text{BO}_3)\text{Si}_2\text{O}_5$  (b).



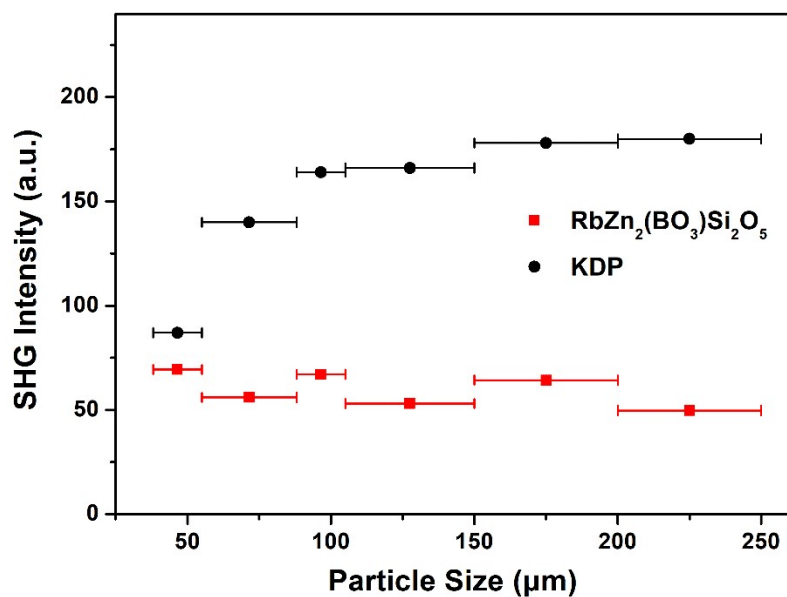

**Figure S6.** Powder SHG measurements for KDP, and  $\text{RbZn}_2(\text{BO}_3)\text{Si}_2\text{O}_5$  (at 1064 nm, Q-switched Nd: YAG laser).

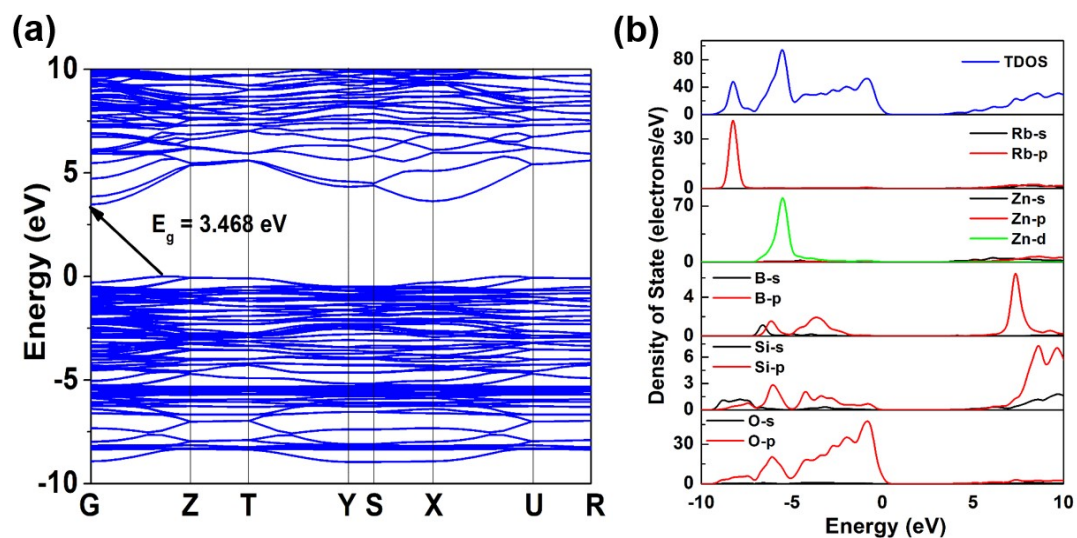

**Figure S7.** Calculated electronic band structure (a), total and partial densities of states (b), of  $\text{RbZn}_2(\text{BO}_3)\text{Si}_2\text{O}_5$ .

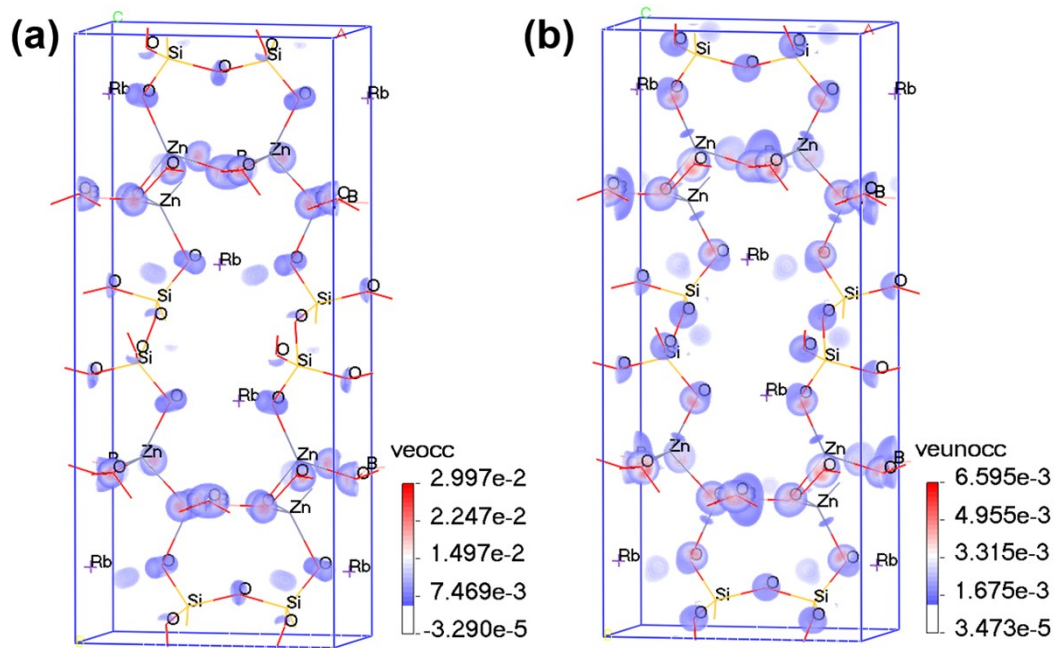

Figure S8. SHG density of occupied (a), and unoccupied (b) for  $\text{RbZn}_2(\text{BO}_3)\text{Si}_2\text{O}_5$ .

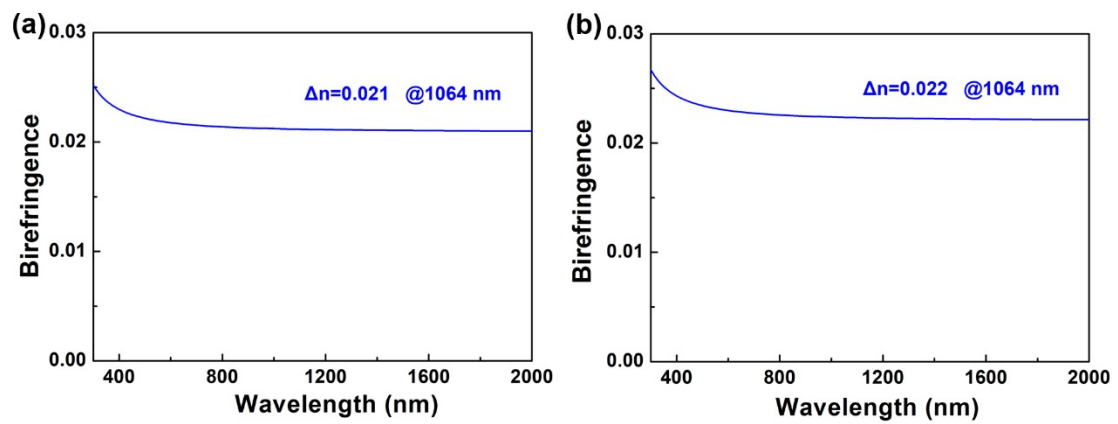

Figure S9. Calculated birefringence curves for  $\text{RbZn}_2(\text{BO}_3)\text{Si}_2\text{O}_5$  (a), and  $\text{CsZn}_2(\text{BO}_3)\text{Si}_2\text{O}_5$  (b).
